# Supplementary material for: Single-dose ciraparantag safely and completely reverses anticoagulant effects of edoxaban
Source: PubMed Central journal article supplement — Thromb Haemost. 2017 Dec 1;117(2):238–45. doi: 10.1160/TH16-03-0224 (PMC6260118; doi:10.1160/th16-03-0224), 2017-12-01

**Supplementary Materials to Ansell et al. “Single-dose ciraparantag safely and completely reverses anticoagulant effects of edoxaban” (Thromb Haemost 2017; 117.2)**

**Suppl. Table 1:** Mean PoC-PT and TEG-R pre- and post- ciraparantag in Period 2 of each cohort. To minimize inter-subject variability, the difference from their time-zero PoC-PT and TEG-R baseline readings (pre-ciraparantag in Period 1 and pre-edoxaban in Period 2) were normalized by the baseline on a per-subject basis to calculate percent reversal. The elevated coagulation parameters eventually return toward baseline following the pharmacokinetics of edoxaban and show little response to ciraparantag administration.

| Time Point, hours           | Prothrombin Time<br>mean ( $\pm$ SE) |            | TEG-R<br>mean ( $\pm$ SE) |            |
|-----------------------------|--------------------------------------|------------|---------------------------|------------|
|                             | Placebo                              | 300 mg     | Placebo                   | 300 mg     |
| 0 (pre-edoxaban)            | 20.4 (0.4)                           | 21.1 (0.3) | 9.2 (0.4)                 | 8.8 (0.6)  |
| 2.75 (Pre-ciraparantag)     | 46.5 (3.0)                           | 39.6 (1.6) | 14.2 (1.1)                | 12.4 (0.7) |
| 10 min post ciraparantag    | 44.8 (4.6)                           | 39.1 (1.3) | 14.4 (1.1)                | 12.2 (0.7) |
| 3.5 hours post ciraparantag | 43.9 (3.2)                           | 38.9 (1.4) | 12.9 (1.7)                | 12.5 (0.4) |
| 4 hours post ciraparantag   | 42.5 (3.6)                           | 36.8 (1.6) | 13.5 (0.8)                | 12.5 (0.6) |
| 15 hours post ciraparantag  | 25.9 (0.5)                           | 24.5 (0.8) | 10.4 (0.6)                | 11.4 (0.8) |
| 27 hours post ciraparantag  | 22.1 (0.5)                           | 22.3 (0.6) | 9.9 (0.4)                 | 9.6 (0.4)  |

SE- standard error of the mean. Data shown only for placebo and highest dose of ciraparantag. Results with lower doses were similar.

**Suppl. Table 2:** Statistical assessment of data points in Figure 3.

| <b>Mg PER977/hrs<br/>post PER977</b> | <b>10 min</b> | <b>30 min</b> | <b>45 min</b> | <b>1.0hr</b> | <b>1.5hr</b> | <b>2.0hr</b> | <b>4.0hr</b> |
|--------------------------------------|---------------|---------------|---------------|--------------|--------------|--------------|--------------|
| <b>25</b>                            |               |               |               |              |              |              |              |
| <b>50</b>                            | *             |               |               | **           |              |              | **           |
| <b>100</b>                           |               | **            | ***           | ***          | **           |              | *            |
| <b>200</b>                           | ***           | **            | ***           | ***          | *            | **           | *            |
| <b>300</b>                           | ***           | **            | ***           | ***          | ***          | *            | **           |

\*p<0.05; \*\*p<0.01; \*\*\*p<0.001

**Suppl. Figure 1:** WBCT (whole-blood clotting time) correlates with the prothrombin time (PT) in whole blood from placebo and edoxaban treated patients.

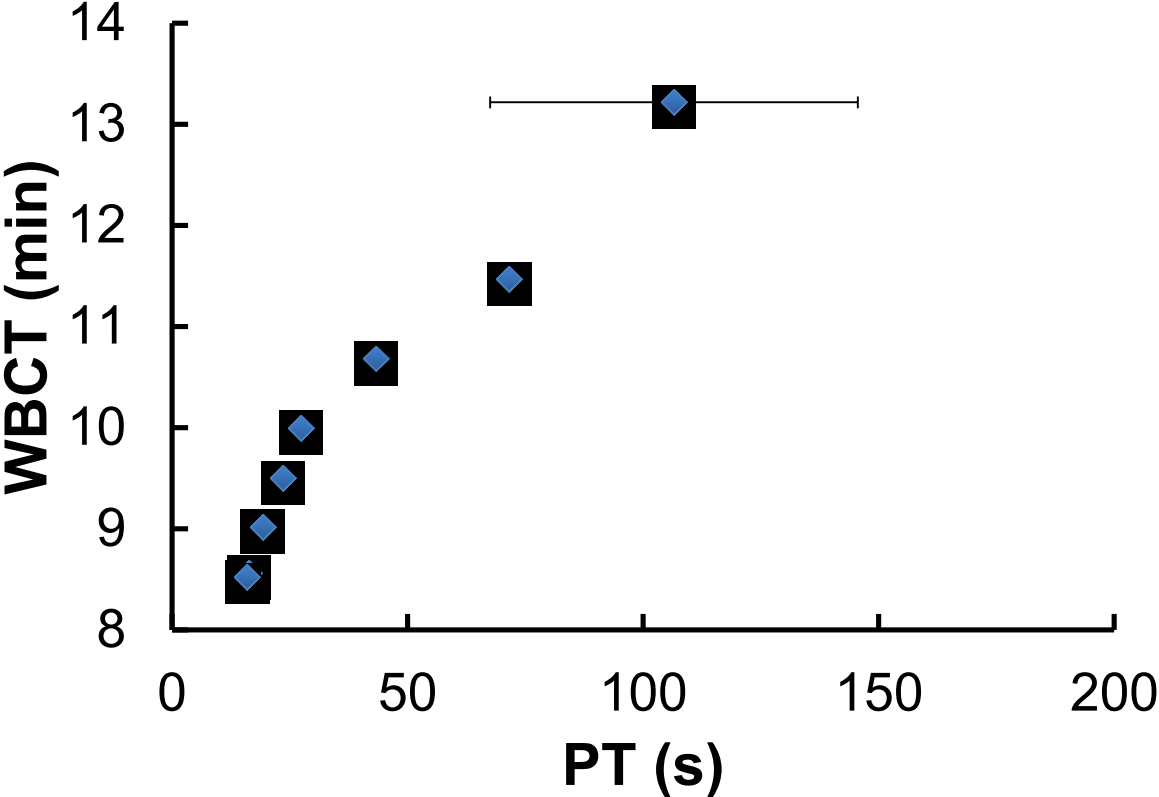

Suppl. Figure 2: Change from baseline WBCT and PT correlated with edoxaban PK values

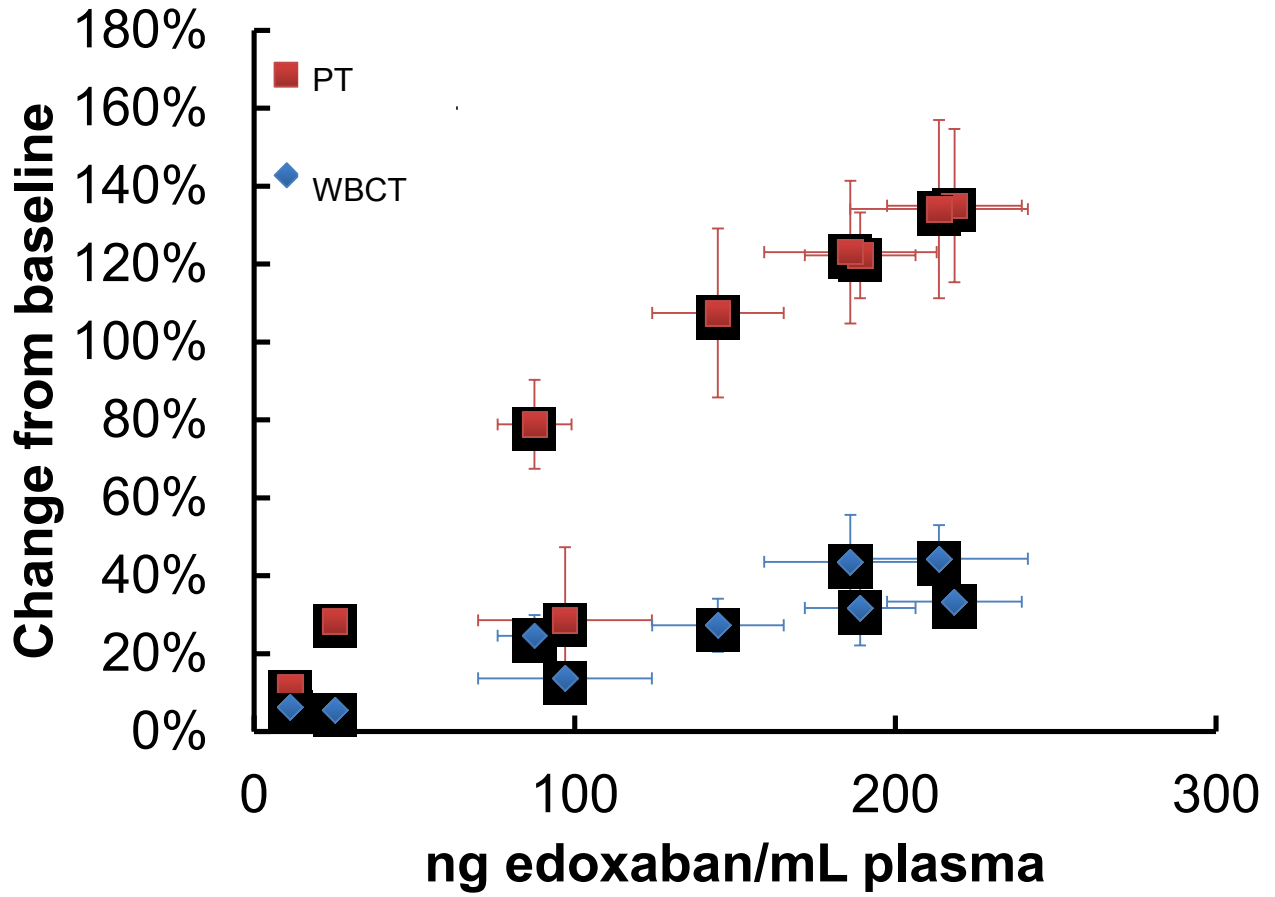

Supplement: 10-1160-th16-03-0224-supp.pdf [file 10-1160-th16-03-0224-supp.pdf]
